# Supplementary material for: A water soluble fluorescent sensor for the reversible detection of tin(iv) ion and phosphate anion
Source: Royal Society of Chemistry journal article supplement (doi:10.1039/c3ra41275j), 2013-01-01
Supplement: c3ra41275j.pdf [file c3ra41275j.pdf]

# Supporting Information

## A Water Soluble Fluorescent Sensor for the Reversible Detection of Tin (IV) Ion and Phosphate Anion

Jing Liu,<sup>a</sup> Kai Wu,<sup>a</sup> Xin Li,<sup>\*b</sup> Yifeng Han<sup>\*a</sup> and Min Xia<sup>a</sup>

<sup>a</sup> Department of Chemistry, The Key Laboratory of Advanced Textile Materials and Manufacturing Technology, Zhejiang Sci-Tech University, Hangzhou, 310018, China.

<sup>b</sup> ZJU-ENS Joint Laboratory of Medicinal Chemistry, College of Pharmaceutical Sciences, Zhejiang University, Hangzhou, 310058, China.

*hanyf@zstu.edu.cn and lixin81@zju.edu.cn*

## Contents

|                                                                     |    |
|---------------------------------------------------------------------|----|
| Determination of quantum yields·····                                | S2 |
| Other Photophysical properties of <b>DQS</b> ·····                  | S2 |
| Determination of the binding constant·····                          | S6 |
| The proposal structure of <b>DQS</b> -Sn <sup>4+</sup> complex····· | S7 |
| The characterization data of all compounds·····                     | S7 |
| References·····                                                     | S9 |

## Determination of quantum yields

The quantum yield of **DQS** ( $\Phi_0$ ) and **DQS-Sn<sup>4+</sup>** ( $\Phi_1$ , in the present of 5 equiv of Sn<sup>4+</sup> ions) were determined according to the literature.<sup>1</sup>

$$\Phi_{Sample} = \frac{\Phi_{QS} \cdot A_{QS} \cdot F_{Sample} \cdot \lambda_{exQS} \cdot \eta_{Sample}^2}{A_{Sample} \cdot F_{QS} \cdot \lambda_{exSample} \cdot \eta_{QS}^2}$$

Where  $\Phi$  is quantum yield; A is absorbance at the excitation wavelength; F is integrated area under the corrected emission spectra;  $\lambda_{ex}$  is the excitation wavelength;  $\eta$  is the refractive index of the solution; the Sample and QS refer to the sample and the standard, respectively. We chose quinine sulfate in 0.1N H<sub>2</sub>SO<sub>4</sub> as standard, which has the quantum yield of 0.546.<sup>2</sup>

## Other Photophysical properties of **DQS**

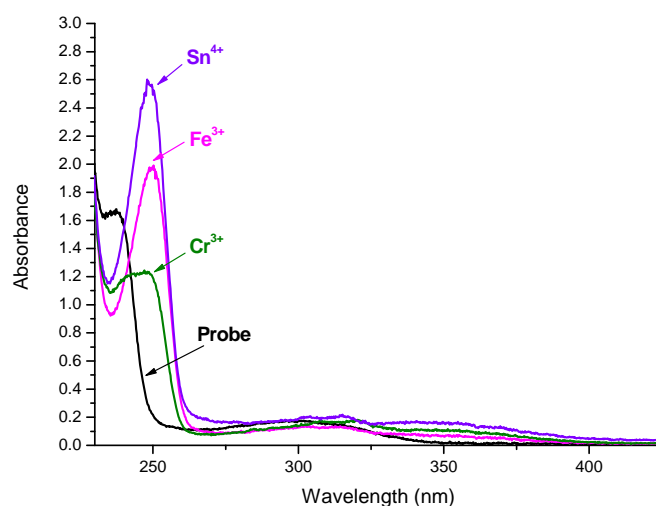

**Figure S1.** Absorption spectra of **DQS** (10  $\mu$ M) in water solution in the presence of Sn<sup>4+</sup>, Fe<sup>3+</sup>, and Cr<sup>3+</sup> (1 equiv), respectively.

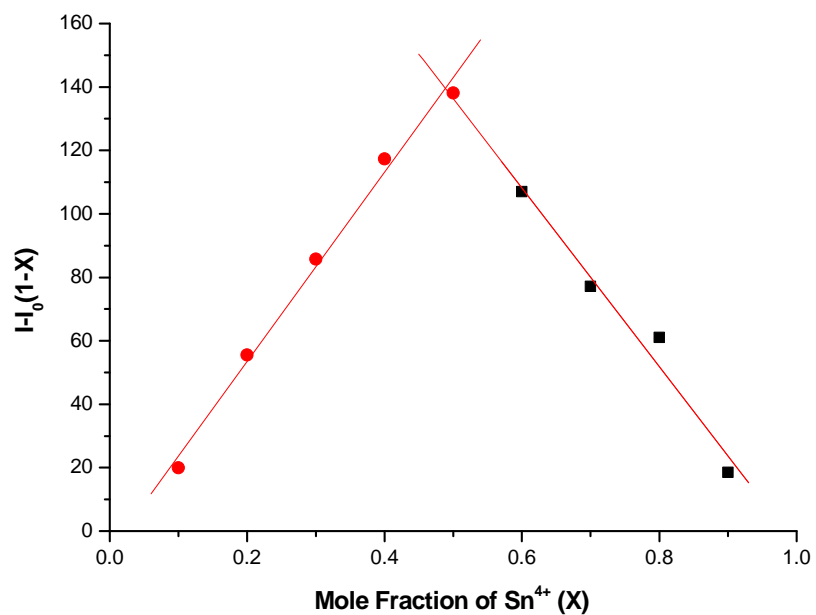

**Figure S2.** Job's plot of sensor **DQS**, the total concentration of the sensor and  $\text{Sn}^{4+}$  is  $25.0 \mu\text{M}$ .

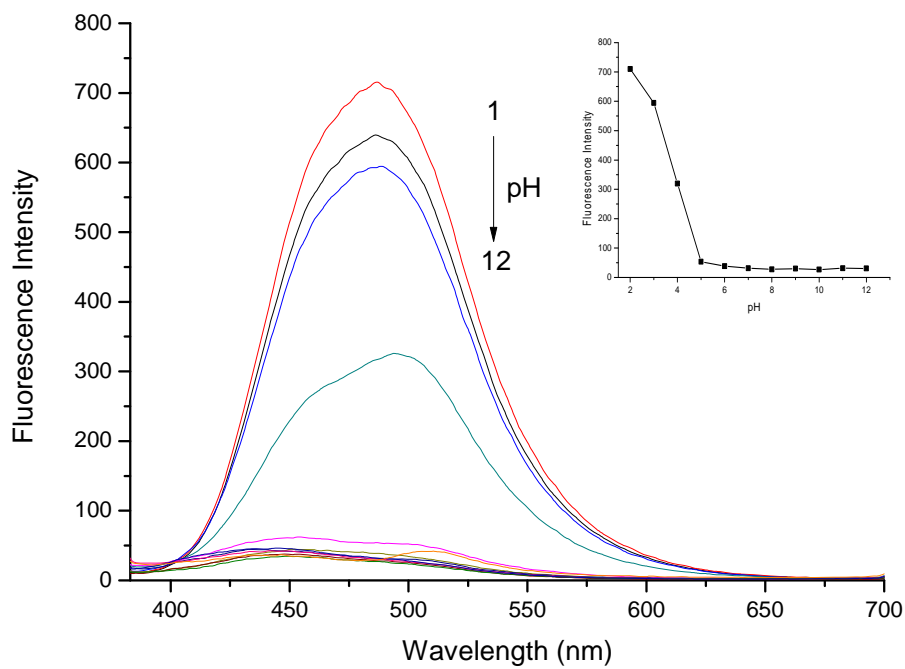

**Figure S3.** Effect of the pH on the fluorescence emission of **DQS** ( $5.0 \mu\text{M}$ ).

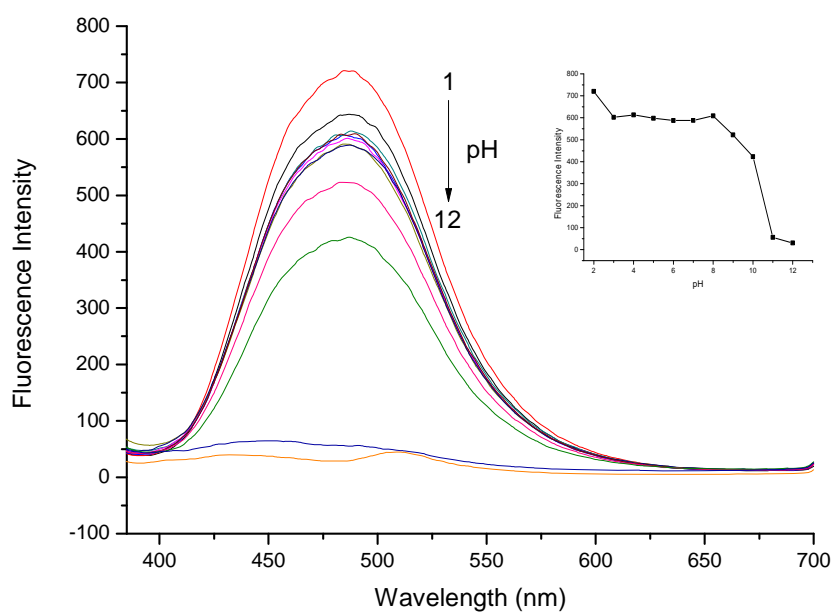

**Figure S4.** Effect of the pH on the fluorescence emission of **DQS-Sn<sup>4+</sup>** complex (5.0  $\mu\text{M}$  of **DQS** in the present of 20 equiv of **Sn<sup>4+</sup>**).

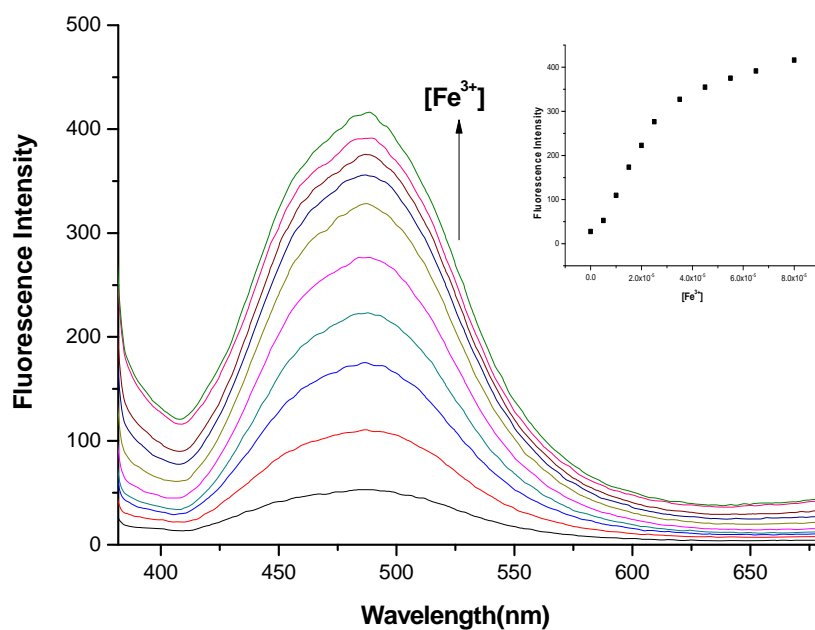

**Figure S5.** Fluorescence spectra of **DQS** (5  $\mu\text{M}$ ) in water in the presence of different concentrations of **Fe<sup>3+</sup>** (0-90  $\mu\text{M}$ ) ( $\lambda_{\text{ex}}$  = 360 nm). Inset: fluorescence intensity changes as a function of **Fe<sup>3+</sup>** concentration.

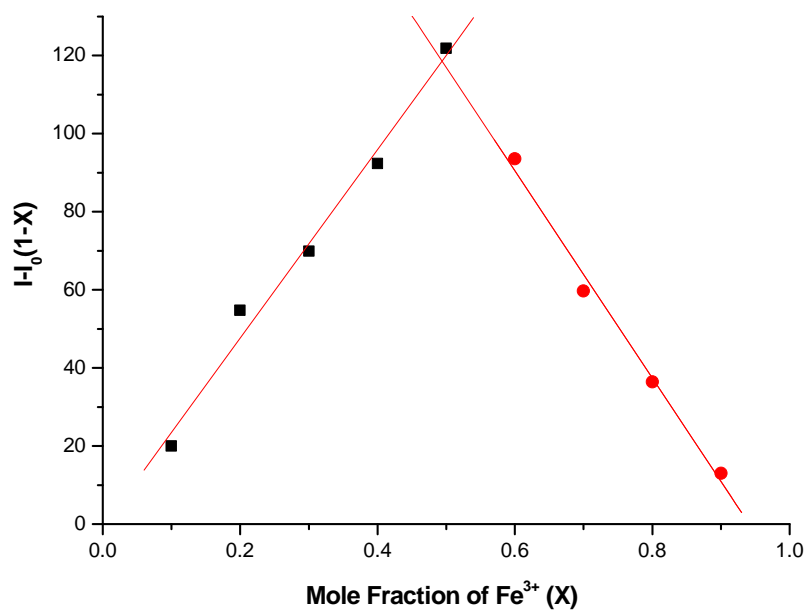

**Figure S6.** Job's plot of sensor **DQS**, the total concentration of the sensor and  $\text{Fe}^{3+}$  is  $25.0 \mu\text{M}$ .

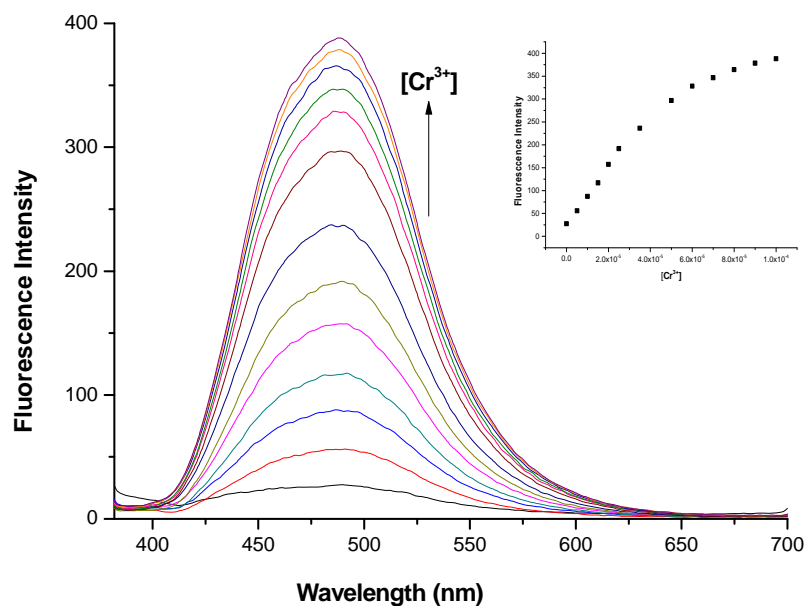

**Figure S7.** Fluorescence spectra of **DQS** ( $5 \mu\text{M}$ ) in water in the presence of different concentrations of  $\text{Cr}^{3+}$  (0-100  $\mu\text{M}$ ) ( $\lambda_{\text{ex}} = 360 \text{ nm}$ ). Inset: fluorescence intensity changes as a function of  $\text{Cr}^{3+}$  concentration.

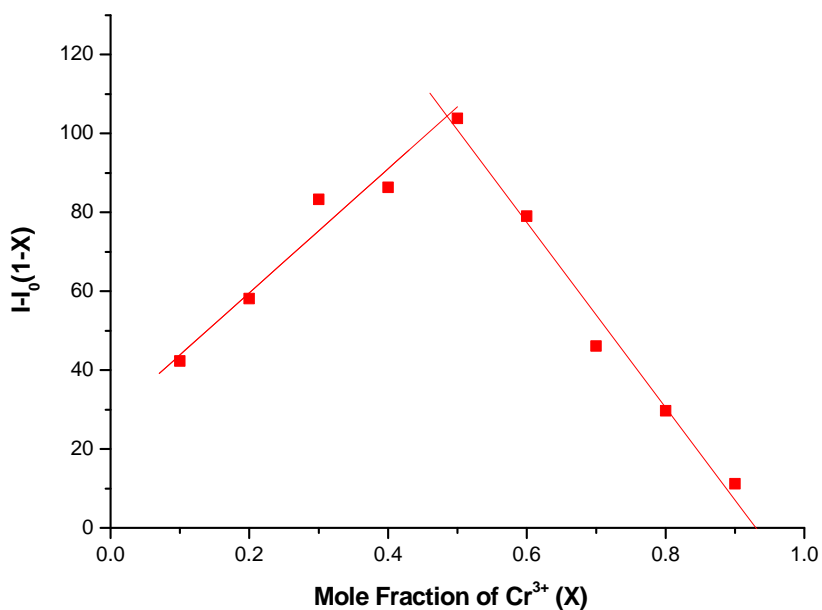

**Figure S8.** Job's plot of sensor **DQS**, the total concentration of the sensor and  $\text{Cr}^{3+}$  is  $25.0 \mu\text{M}$ .

### Determination of the binding constant

The apparent binding constant ( $K_S$ ) of **DQS** with  $\text{Sn}^{4+}$  was determined using the nonlinear least-squares analysis base on a 1:1 complex expression:<sup>3</sup>

$$\frac{F}{F_0} = 1 + \left( \frac{F_{\max}}{2F_0} - \frac{1}{2} \right) \left[ 1 + \frac{C_M}{C_L} + \frac{1}{K_S C_L} - \sqrt{\left( 1 + \frac{C_M}{C_L} + \frac{1}{K_S C_L} \right)^2 - 4 \frac{C_M}{C_L}} \right]$$

Where  $F_0$  or  $F$  is the fluorescence emission intensities in the absence or presence of  $\text{Sn}^{4+}$  ions,  $C_M$  and  $C_L$  are the concentrations of  $\text{Sn}^{4+}$  and **DQS**, and  $K_S$  is the stability constant.

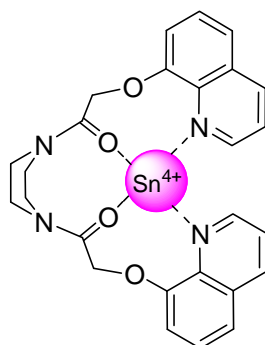

**Figure S9.** A proposed structure of **DQS-Sn<sup>4+</sup>** complex.

## The characterization data of all compounds

### <sup>1</sup>H NMR of compound **1**

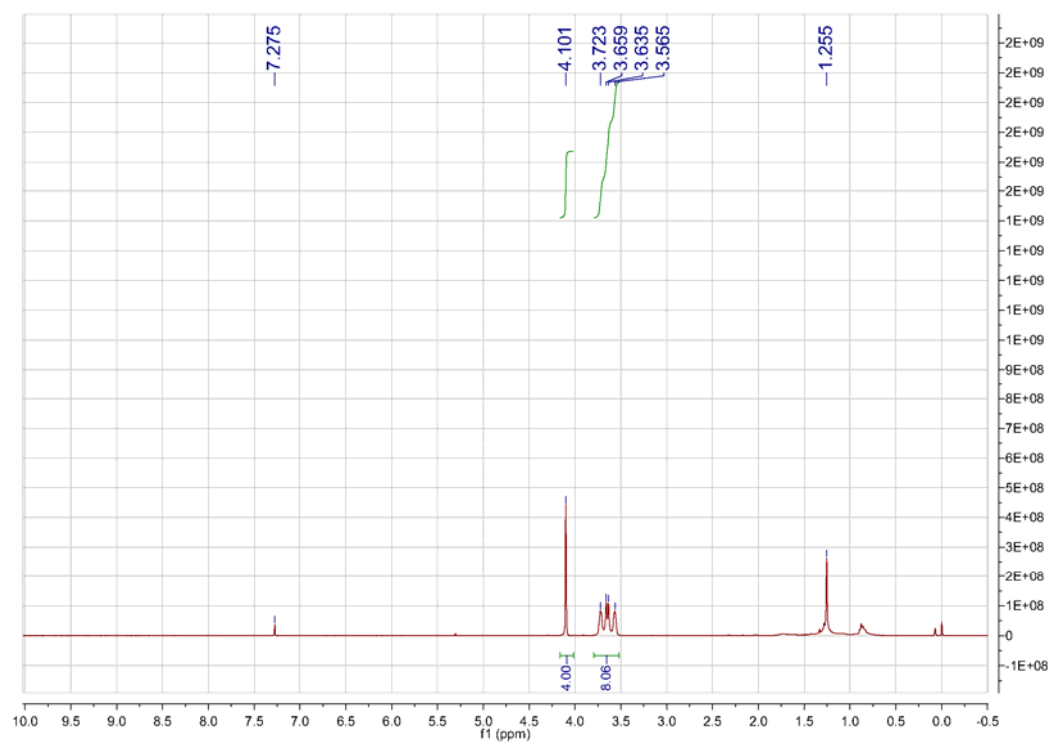

$^1\text{H}$  NMR of compound **2** (DQS)

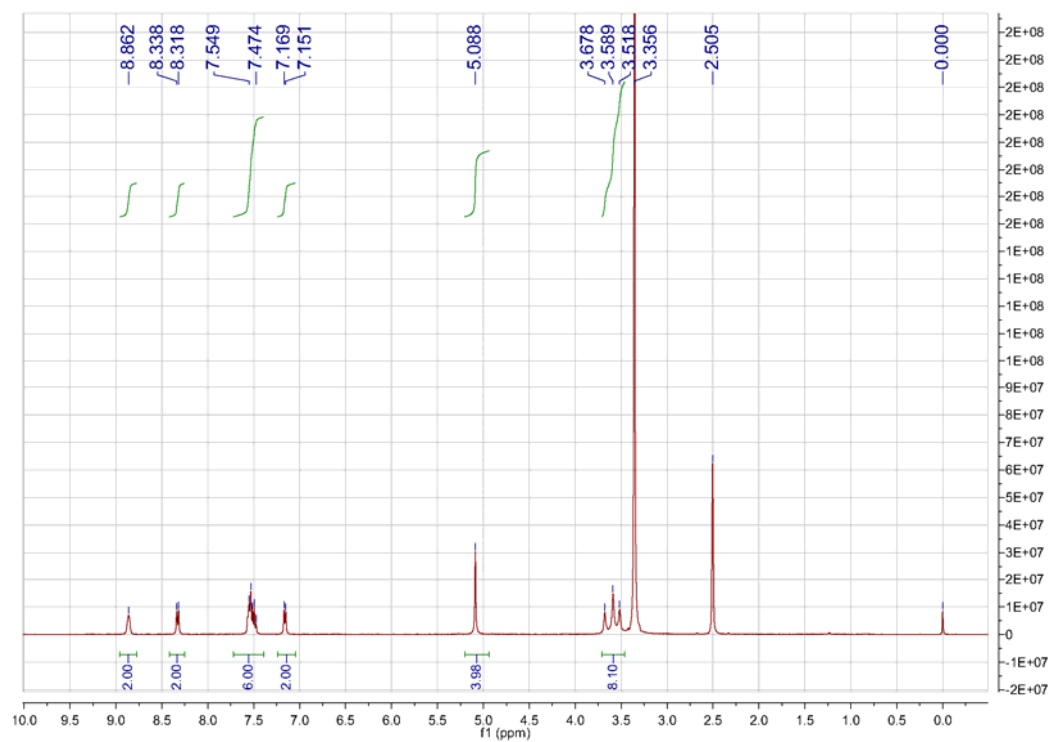

$^{13}\text{C}$  NMR of compound **2** (DQS)

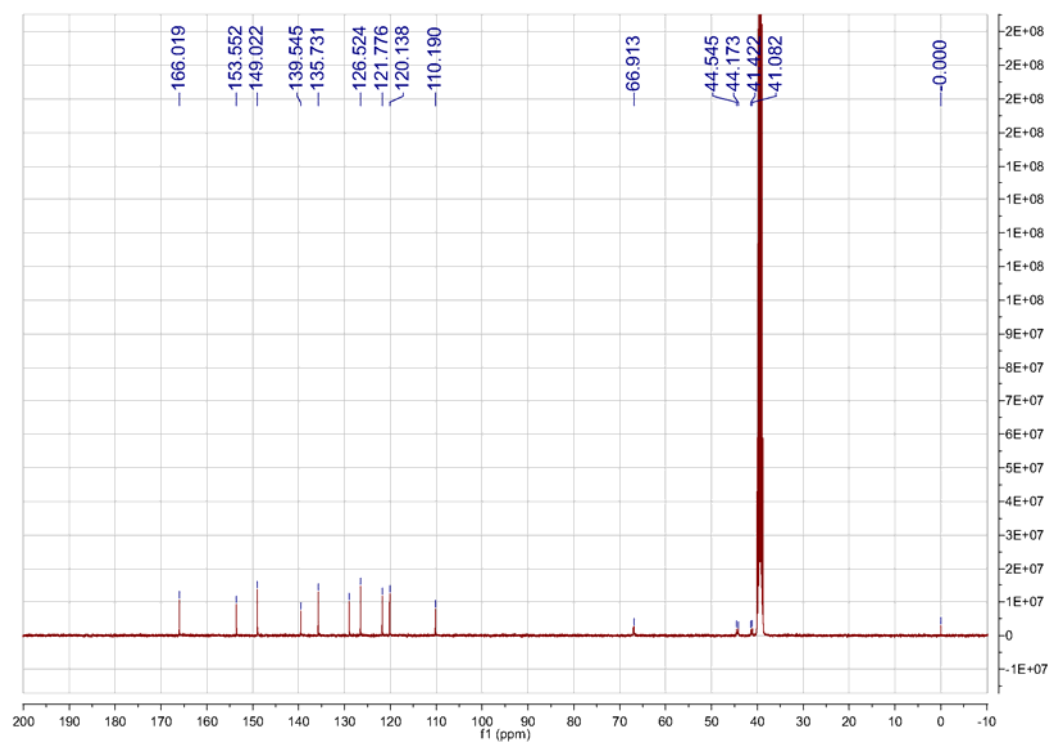

## HRMS of compound **2** (DQS)

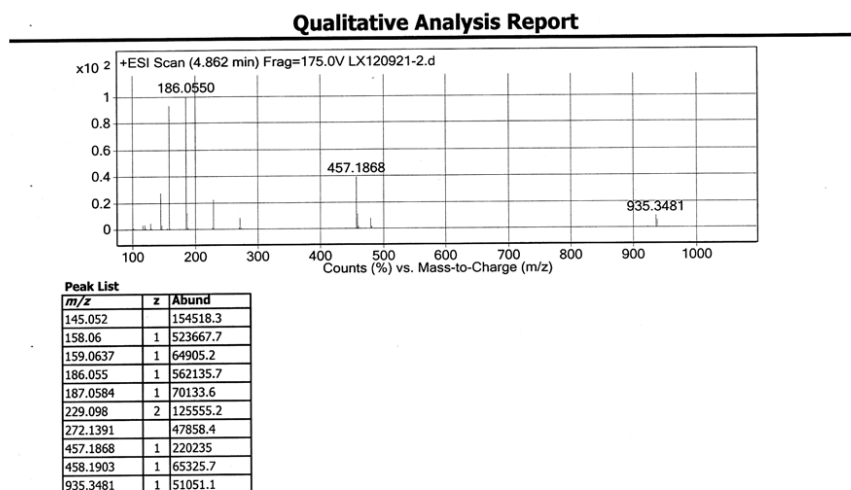

## References

- (1) Velapoldi, R. A.; Tønnesen, H.; H. *J. Fluoresc.* **2004**, *14*, 465-472.
- (2) Eaton, D. F. *Pure Appl. Chem.* **1988**, *60*, 1107-1114.
- (3) Valeur, B. *Molecular Fluorescence Principle and Applications*; Wiley-VCH Verlag GmbH: New York, 2001.
